# Supplementary material
Source: Research Square preprint supplement (doi:10.21203/rs.3.rs-8802980/v1)
Supplement: Supplementary file 1 [file 19256ae3f1aadb2f5fd6de52.docx]

| **Strain name** | **Genotype** | **Reference** |
| --- | --- | --- |
| RIB40 | Wild-type | Machida et al., 2005 |
| NSRku70-1-1 | *niaD*- *sC*- *adeA-* D*argB* D*ku70*::*argB* | Escaño et al., 2009 |
| NSRku70-1-1A | *niaD*- *sC*- *adeA-* D*argB* D*ku70*::*argB* *adeA* | Escaño et al., 2009 |
| NSRku70-1-1AsC | *niaD*- *sC*-::*sC* *adeA-* D*argB* D*ku70*::*argB* *adeA* | This study |
| PA8GAtg8 | *niaD*- *sC*- *adeA-* D*argB* D*ku70*::*argB* D*Aoatg8*::*adeA* P*Aoatg8-egfp-Aoatg8*::*niaD* | Tadokoro et al., 2015 |
| NSRku70-1-1A-AoPgkA-EGFP | *niaD*- *sC*- *adeA-* D*argB* D*ku70*::*argB* *adeA* P*pgkA-pgkA-egfp*::*niaD* | This study |
| NSRku70-1-1AsC-AnH2B-EGFP | *niaD*- *sC*-::*sC* *adeA-* D*argB* D*ku70*::*argB* *adeA* P*h2b*-*h2b-egfp*::*niaD* | This study |
| D*Aoatg1* | *niaD*- *sC*- *adeA-* D*argB* D*ku70*::*argB* D*Aoatg1*::*adeA* | Yanagisawa et al., 2013 |
| DA1EA8 | *niaD*- *sC*- *adeA-* D*argB* D*ku70*::*argB* D*Aoatg1*::*adeA* P*Aoatg8-egfp-Aoatg8*::*niaD* | Yanagisawa et al., 2013 |
| DAoatg8-1-1 | *niaD*- *sC*- *adeA-* D*argB* D*ku70*::*argB* D*Aoatg8*::*adeA* | Kikuma et la., 2006 |
| D*Aoatg8*sC | *niaD*- *sC*-::*sC* *adeA-* D*argB* D*ku70*::*argB* D*Aoatg8*::*adeA* | This study |
| D*Aoatg8*-AoPgkA-EGFP | *niaD*- *sC*- *adeA-* D*argB* D*ku70*::*argB* D*Aoatg8*::*adeA* P*pgkA-pgkA-egfp*::*niaD* | This study |
| D*Aoatg8*sC-AnH2B-EGFP | *niaD*- *sC*-::*sC* *adeA-* D*argB* D*ku70*::*argB* D*Aoatg8*::*adeA* P*h2b*-*h2b-egfp*::*niaD* | This study |
| D*Aoatg15* | *niaD*- *sC*- *adeA-* D*argB* D*ku70*::*argB* D*Aoatg15*::*adeA* | Kikuma et al., 2011 |
| D*Aoatg15*sC | *niaD*- *sC*-::*sC* *adeA-* D*argB* D*ku70*::*argB* D*Aoatg15*::*adeA* | This study |
| DA15EA8 | *niaD*- *sC*- *adeA-* D*argB* D*ku70*::*argB* D*Aoatg15*::*adeA* P*Aoatg8-egfp-Aoatg8*::*niaD* | Hashimoto et al., 2024 |
| D*Aoatg15*-AoPgkA-EGFP | *niaD*- *sC*- *adeA-* D*argB* D*ku70*::*argB* D*Aoatg15*::*adeA* P*pgkA-pgkA-egfp*::*niaD* | This study |
| DAoatg15AnH2B | *niaD*- *sC*- *adeA-* D*argB* D*ku70*::*argB* D*Aoatg15*::*adeA* P*h2b*-*h2b-egfp*::*niaD* | Hashimoto et al., 2024 |
| D*pepE* | *niaD*- *sC*- *adeA-* D*argB* D*ku70*::*argB* D*pepE*::*adeA* | This study |
| D*pepE*sC | *niaD*- *sC*-::*sC* *adeA-* D*argB* D*ku70*::*argB* D*pepE*::*adeA* | This study |
| D*pepE*-EGFP-AoAtg8 | *niaD*- *sC*- *adeA-* D*argB* D*ku70*::*argB* D*pepE*::*adeA* P*Aoatg8-egfp-Aoatg8*::*niaD* | This study |
| D*pepE*-AoPgkA-EGFP | *niaD*- *sC*- *adeA-* D*argB* D*ku70*::*argB* D*pepE*::*adeA* P*pgkA-pgkA-egfp*::*niaD* | This study |
| D*pepE*sC-AnH2B-EGFP | *niaD*- *sC*-::*sC* *adeA-* D*argB* D*ku70*::*argB* D*pepE*::*adeA* P*h2b*-*h2b-egfp*::*niaD* | This study |
| D*Aoprb1* | *niaD*- *sC*- *adeA-* D*argB* D*ku70*::*argB* *adeA* D*Aoprb1*::*sC* | This study |
| D*Aoprb1*-EGFP-AoAtg8 | *niaD*- *sC*- *adeA-* D*argB* D*ku70*::*argB* *adeA* D*Aoprb1*::*sC* P*Aoatg8-egfp-Aoatg8*::*niaD* | This stuDy |
| D*Aoprb1*-AoPgkA-EGFP | *niaD*- *sC*- *adeA-* D*argB* D*ku70*::*argB* *adeA* D*Aoprb1*::*sC* P*pgkA-pgkA-egfp*::*niaD* | This study |
| D*Aoprb1*-AnH2B-EGFP | *niaD*- *sC*- *adeA-* D*argB* D*ku70*::*argB* *adeA* D*Aoprb1*::*sC* P*h2b*-*h2b-egfp*::*niaD* | This study |
| D*pepE*D*Aoprb1* | *niaD*- *sC*- *adeA-* D*argB* D*ku70*::*argB* D*pepE*::*adeA* D*Aoprb1*::*sC* | This study |
| D*pepE*D*Aoprb1*-EGFP-AoAtg8 | *niaD*- *sC*- *adeA-* D*argB* D*ku70*::*argB* D*pepE*::*adeA* D*Aoprb1*::*sC* P*Aoatg8-egfp-Aoatg8*::*niaD* | This study |
| D*pepE*D*Aoprb1*-AoPgkA-EGFP | *niaD*- *sC*- *adeA-* D*argB* D*ku70*::*argB* D*pepE*::*adeA* D*Aoprb1*::*sC* P*pgkA-pgkA-egfp*::*niaD* | This study |
| D*pepE*D*Aoprb1*-AnH2B-EGFP | *niaD*- *sC*- *adeA-* D*argB* D*ku70*::*argB* D*pepE*::*adeA* D*Aoprb1*::*sC* P*h2b*-*h2b-egfp*::*niaD* | This study |
