# Supplementary material
Source: Research Square preprint supplement (doi:10.21203/rs.3.rs-8802980/v1)
Supplement: Supplementary file 3 [file ae0c5916a062c3dfa215b65a.docx]

| **Primer name** | **Sequence (5’ to 3’)** |
| --- | --- |
| pepE-up-Fw | AGCTCGGTACCCGGGGATCCCCGTTTATGACACCCTAC |
| pepE-up-Rv | ATGTGAGTCTAGCACCCATGGTGGGCGACAACGGCGAC |
| pepE-down-Fw-3 | TAAGGTTCCTGCGGTCTAGCATGATAGCCTGCCTCGGTAG |
| pepE-down-Rv-3 | AGGTCGACTCTAGAGGATCACCCAAATCTCAGCGGATGGCT |
| adeA-Fw | GTCGCCGTTGTCGCCCACCATGGGTGCTAGACTCACAT |
| adeA-Rv | TACCGAGGCAGGCTATCATGCTAGACCGCAGGAACCTTA |
| AO090020000517-up-Fw | AGCTCGGTACCCGGGGATCCCACGGTTTCCGTACGATC |
| AO090020000517-up-Rv | CATCTGCGAGATCGGATCGGATGGGCAACAAGAGTGAC |
| AO090020000517-down-Fw | AATCTCAGAAAATCCGCGGATGCAAGACAAGACTTGAT |
| AO090020000517-down-Rv | AGGTCGACTCTAGAGGATCGGAAAGTGACAAGACCGCC |
| sC-Fw-2 | CGATCCGATCTCGCAGATGTCTTT |
| sC-Rv-2 | CCGCGGATTTTCTGAGATTTAGTTCC |
| Aoprb1 colony PCR-Fw | CCGACCGCCTGTATTACCTGTATTG |
| Aoprb1 colony PCR-Rv | GAACGTACCGTAGATGTTGAACGC |
| PgkA promoter-Fw | ACAACGAGCTGGGAACCCCAAGATAACAAGCTGAGACG |
| PgkA ORF-Rv | ACAAGAAAGCTGGGTCCCCCTTACTTGACAGAGCATCA |
